# Supplementary material for: Getting control of hydrogel networks with cross-linkable monomers
Source: Royal Society of Chemistry journal article supplement (doi:10.1039/d1tb00482d), 2021-01-01

**Supporting Information for**  
**Getting Control of Hydrogel Networks with Cross-Linkable Monomers**

**Pamela G. Cohn<sup>1\*</sup>, Sahar Qavi<sup>2</sup>, Jasmine Cubuk<sup>1</sup>, Mihir Jani<sup>1</sup>, Mohamed Lamine Megdad<sup>1</sup>, Dhvani Shah<sup>1</sup>, Cara Cattafi<sup>1</sup>, Panchatapa Baul<sup>1</sup>, Shanthi Rajaraman<sup>1</sup>, and Reza Foudazi<sup>2\*</sup>**

<sup>1</sup>Chemistry Program, Stockton University, Galloway, NJ 08205; <sup>2</sup>Department of Chemical and Materials Engineering, New Mexico State University, Las Cruces, NM 88003.

## **Experimental**

### *General*

Nuclear Magnetic Resonance (NMR) spectra were recorded on a 400 MHz Bruker Ascend NMR magnet at 24 °C. Chemical shifts are reported in parts per million (ppm) with reference to Dimethyl sulfoxide (*d*<sup>6</sup>-DMSO) and water (D<sub>2</sub>O) or chloroform (CDCl<sub>3</sub>) and deuterated methanol (CD<sub>3</sub>OD) as the solvent. Multiplicities are abbreviated as followed: singlet (s), doublet (d), triplet (t), multiplet (m). Thin Layer Chromatography was done on a 3 by 1 inch MF254 silica plate, pH 5, with an alumina backing. The eluent used was made of 90% dichloromethane with 10% ethanol. All solids were dissolved in 50% dichloromethane / methanol, methanol, dichloromethane, ethanol or dichloromethane/ethanol. Centrifugation used to separate materials. Beckman Coulter Avanti J-265 XP at 19°C run at JS745 at 2000 rpm for 5 minutes. The compounds were centrifuged with four mini 50 mL centrifuge tubes. Infrared Spectroscopy (IR) spectra were recorded on a Nicolet iS5 using an Id5 ATR diamond. The bands are recorded in wavenumbers (cm<sup>-1</sup>). Freeze-drying of the materials was done on a LABCOND Freezeone 6 plus Lyophilize Machine. Chiller was set to -60°C. Vacuum set to high with mBAR ~0.42 mBAR. Freezer's lowest temp chilled to -87°C.

Differential scanning calorimetry analysis was performed on gels using a Q20 TA instrument. After loading the sample into the calorimeter, the temperature the pans were cooled to -50 °C and heated at 5 °C/ min.

Frequency Sweep rheological measurements were performed on the gels using a TA Discovery HR-3 rheometer with an objective with cross-hatch geometry.

The compressive stress-strain measurements were performed on hydrogels swollen with DI water by using a Shimadzu universal testing machine (AGS-X Series) at a crosshead speed of 1 mm/min. The cylindrical gel samples were 20 mm in diameter and 10 mm in thickness.

All reagents (N,N'-methylenebis(acrylamide), pentaerythritol(tetrakis(3-mercaptopropionate), 4,4'-azobis(4-cyanovaleric acid) were purchased from Sigma Aldrich Chemical Company. All solvents for reactions, purification, and spectroscopic analyses (absolute ethanol, dichloromethane, methanol) were purchased from ThermoFisher Scientific.

### **Representative Synthesis of Poly(MBA-*co*-PTK):**

#### *2:1, thiol:ene:*

Absolute ethanol (50 mL) was degassed in a 100 mL round bottom flask (RBF) with nitrogen for 1 h. N, N'-methylenebis(acrylamide)(MBA), (1.000 g, 6.48 mmol) and 4,4'-Azobis (4-cyanovaleric acid)(0.05 g, 0.178 mmol) were placed in a 100 mL round bottom flask with a magnetic stir bar. The system was purged with argon gas for 5 min. Pentaerythritol tetrakis(3-mercaptopropionate) (PTK) (2.47 mL, 6.46 mmol) was

added via syringe. Degassed ethanol (10 mL) was also added via syringe, and the resulting solution was heated to 70 °C and stirred for 16 h. The resulting rubber-like copolymer poly(MBA-*co*-PTK)) was triturated with ethanol (100 mL), stirred and sonicated and vacuum filtered. The product gelled and was triturated with absolute ethanol, followed by deionized water. The gel was freeze-dried and characterized via thermal analysis, swelling measurements, and rheo-mechanical testing.

**S1A:** JC35 (2:1, thiol:ene, D<sub>2</sub>O, 400 MHz) NMR analysis:

In the sample containing a 2:1 composition of thiol:ene groups, there is no presence of the vinyl end group in the spectrum. The spectrum would suggest the structure is comprised of the di-substituted thiol-ene adduct, which is consistent with the following hydrolysis product (with ChemDraw chemical shifts indicated in blue on the structure):

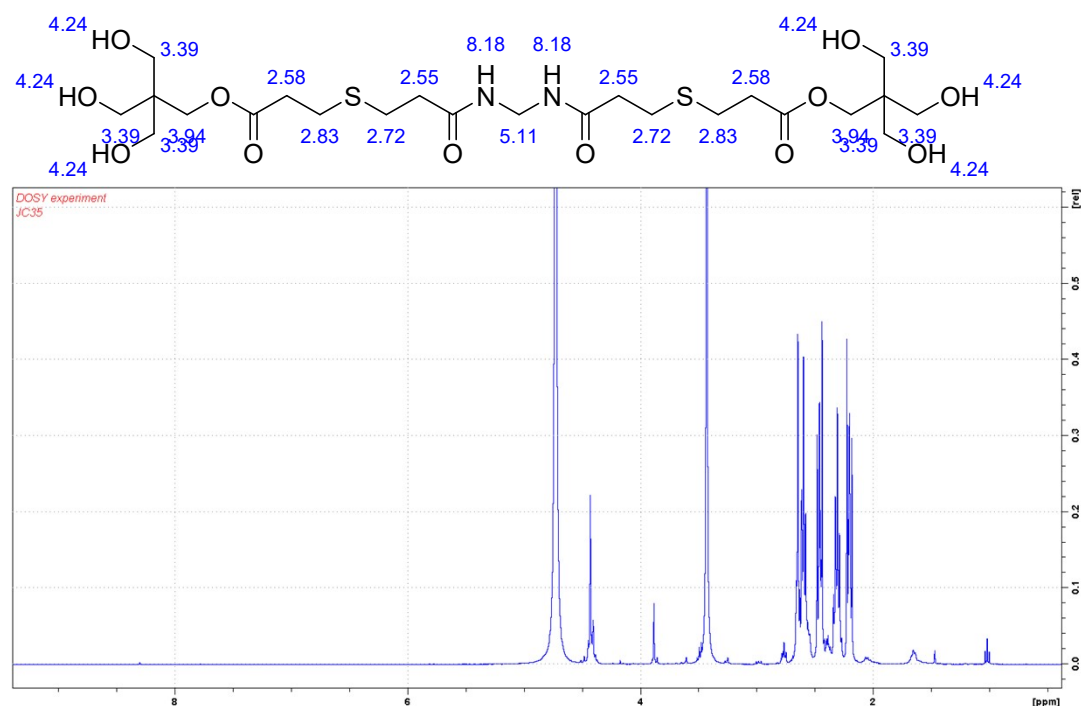

**S1B:** DOSY NMR analysis of 2:1 (thiol:ene) gel in D<sub>2</sub>O (400 MHz)

The DOSY NMR spectrum (at pH~10) shows one major diffusion coefficient at -9.7 (log(m<sup>2</sup>/s)) in addition to residual water.

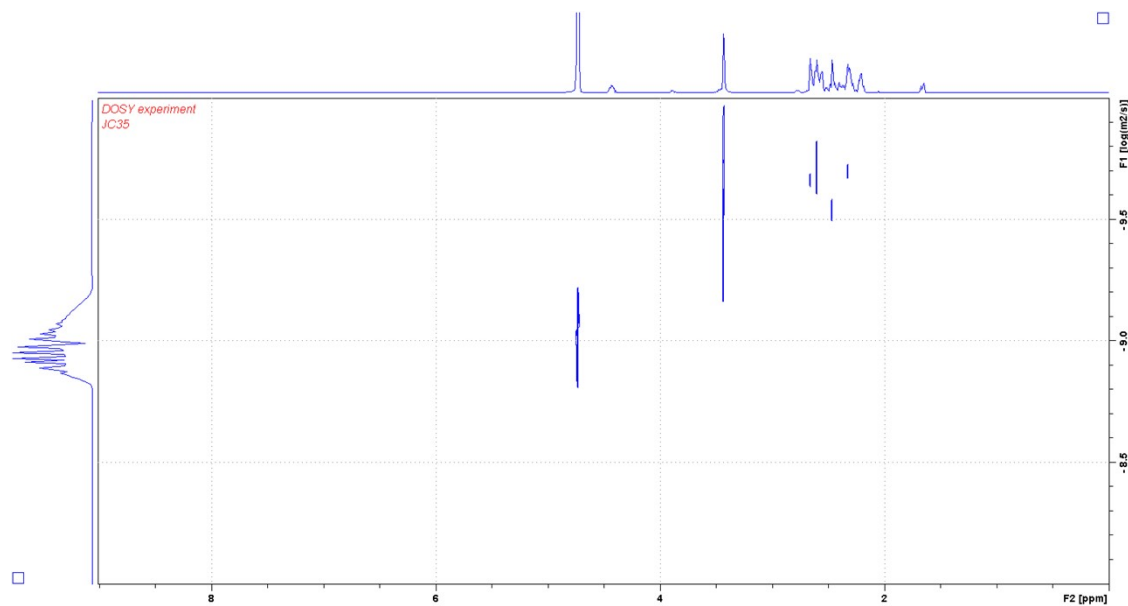

*Differential Scanning Calorimetry of Different Gel Compositions and their crystallization exotherms:*

**S2 A:** 1:1, thiol:ene, DSC (scan rate 10 °C/ min)

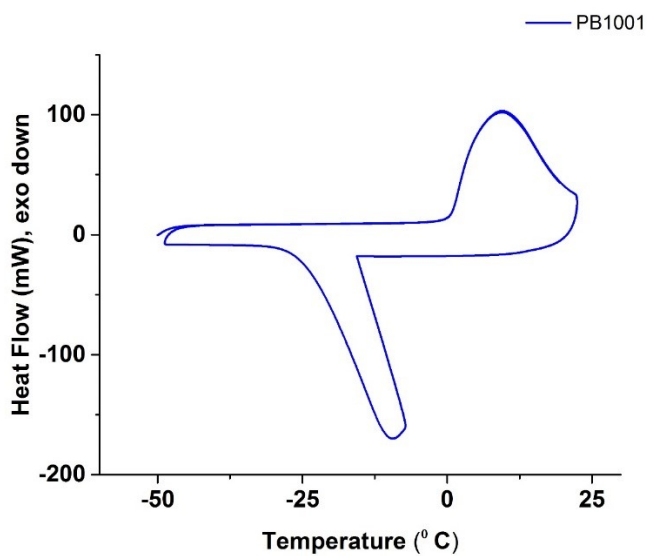

**S2B:** 4:1, thiol:ene, DSC (scan rate 10 °C/ min)

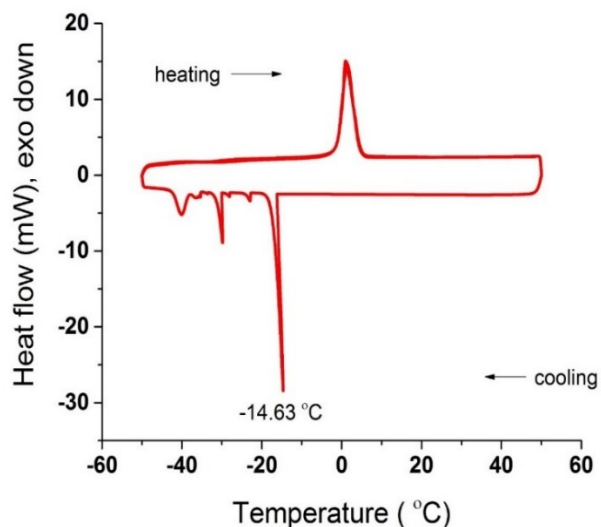

**S3:** *Infrared Spectra for 2:1 Gel composition before and after swelling*

The infrared spectra of both wet and dry states for the 2:1, thiol:ene composition of gel were unremarkable. The presence of the free thiol groups is indicated by a small broad S-H stretch at  $\sim 2600\text{ cm}^{-1}$ . Additionally, the amidic carbonyl stretch at  $1650\text{ cm}^{-1}$  (from MBA) and the ester carbonyl stretch (from PTK) at  $1730\text{ cm}^{-1}$  suggest incorporation of both monomers in to the gel network. Upon the addition of water, the only noticeable change is the broadened O-H stretch at  $3304\text{ cm}^{-1}$ , which is indicative of hydrogen bonding in the material.

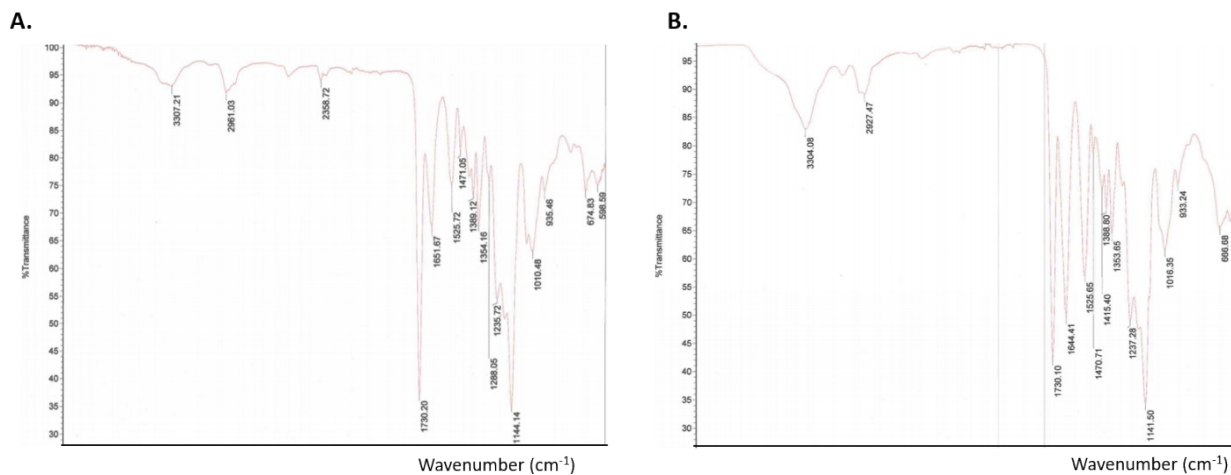

The infrared spectrum (neat) for the A) 2:1, thiol:ene, PTK: MBA, dry state for the gel; B) 2:1, thiol:ene, PTK: MBA, wet state after swelling in water for 24 h.

**Table 1.** Spectral Assignment for Hydrogel with 1:1, thiol: ene functionality.

| Signal | Chemical Shift (ppm) | Number Hydrogens | Multiplicity ( $J^{\beta}$ in Hz) | Group                              |
|--------|----------------------|------------------|-----------------------------------|------------------------------------|
| A      | 5.3183-5.9468        | 3                | m                                 | -CH (alkenyl, overlapping signals) |
| B      | 4.1772-4.2942        | 8                | s                                 | -CH <sub>2</sub> O-                |
| C      | 3.2628-3.6832        | 18               | s                                 | (overlapping signals)              |
| D      | 2.0761-2.3442        | 56               | m                                 | (overlapping signals)              |
| E      | 1.8631               | 2                | t ( $J = 6.8$ Hz)                 | -CH <sub>2</sub> CH <sub>2</sub> - |
| F      | 1.4666               | 2                | t ( $J = 6.8$ Hz)                 | -CH <sub>2</sub> CH <sub>2</sub> - |

**S4A:** Standard Curve for DOSY NMR (CDCl<sub>3</sub>, 400 MHz) for polystyrene standard compounds of MW (g/mole) of 2500, 5000, 9000, 30000, 50000: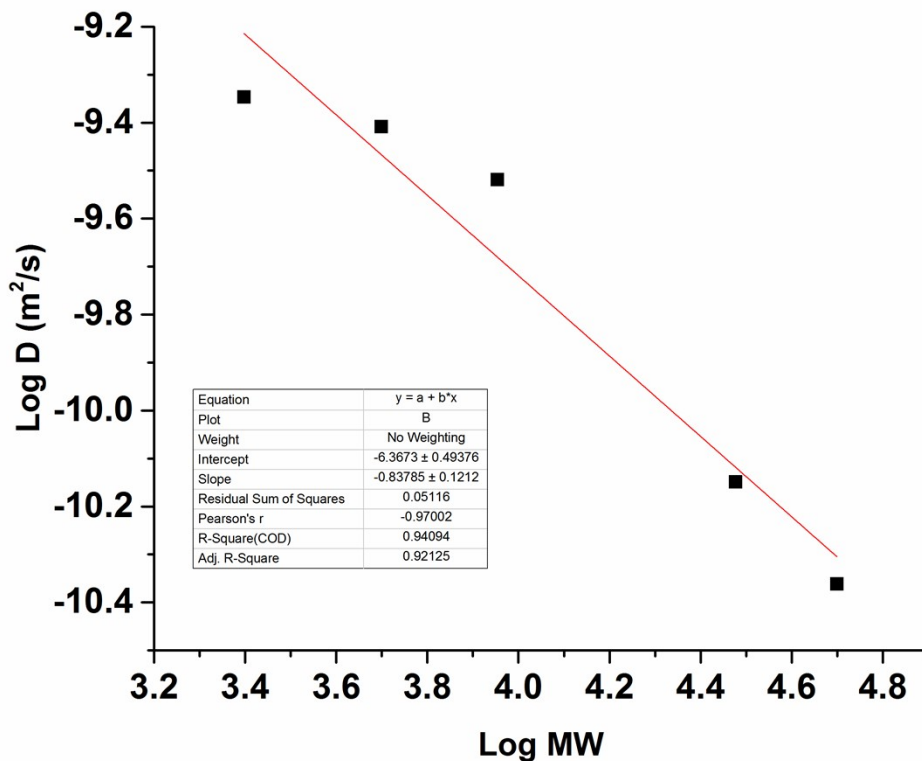**S4B:** DOSY NMR Spectrum of 1:1, thiol:ene gel after basic degradation and extraction into CDCl<sub>3</sub> (400 MHz):

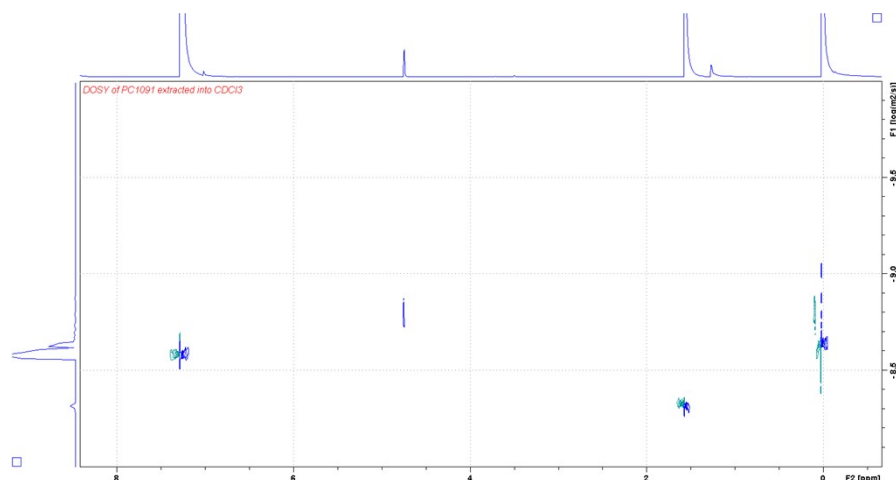

### **S5: Rheological Measurements:**

All rheological measurements were performed with a Discovery Hybrid Rheometer (DHR3) from TA Instruments (New Castle, DE, USA). All experiments were carried out at constant temperature of 25 °C with a parallel plate geometry with a diameter of 40 mm and a gap between plates of 1 mm and using a solvent trap to avoid solvent evaporation. Dynamic frequency sweep was done at  $\omega=0.1-1000$  rad/s in the linear viscoelastic regime with constant strain of 1%.

$G=nRT$  , we know  $R=8.314$  J/mol.K and  $T=25$  °C= $298.15$  K

2:1, thiol: ene in chloroform --->  $G=2 \times 10^5$  --->  $n=80.68 \sim 81$

2:1, thiol: ene in water--->  $G=10^4$  --->  $n=4.03 \sim 4$

---

% of chemical crosslinks=  $4/81 \times 100 = 4.94\% \sim 5\%$

% of physical crosslinks=  $(81-4)/81 \times 100 = 95.06\% \sim 95\%$

4:1, thiol: ene in chloroform --->  $G=10^5$  --->  $n=40.34 \sim 40$

4:1, thiol: ene in water--->  $G=5 \times 10^3$  --->  $n=2.02 \sim 2$

---

% of chemical crosslinks=  $2/40 \times 100 = 5\%$

% of physical crosslinks=  $(40-2)/40 \times 100 = 95\%$

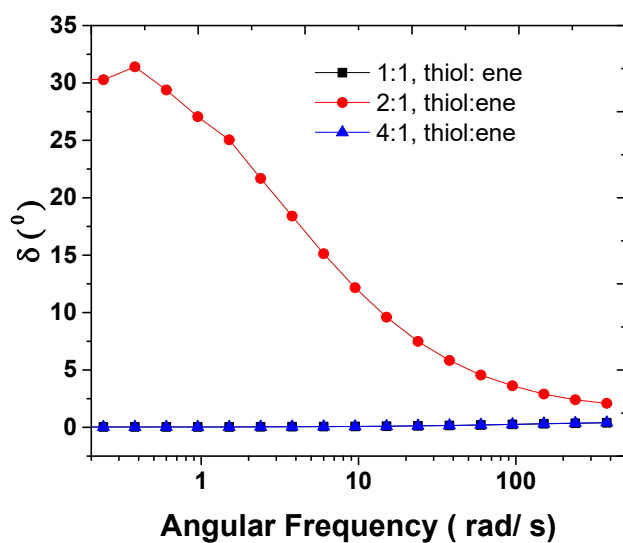

$\delta'$  measurements from frequency sweep measurements for various thiol:ene gel compositions in water.

#### S6: Kinetic Swelling Measurements for hydrogels:

Swelling measurements based on mass uptake of water were taken on  $\sim 0.100$  g samples of freeze-dried gels over time as they were immersed in deionized water at room temperature.

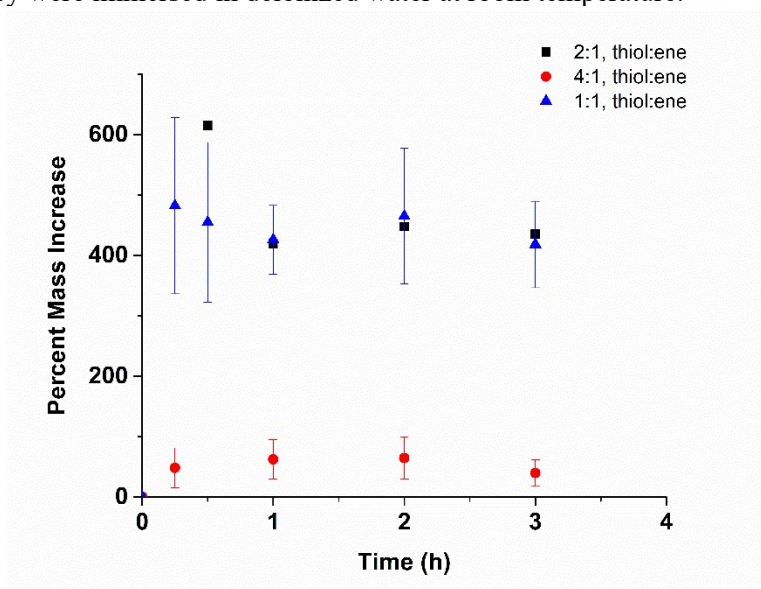

Supplement: d1tb00482d1.pdf [file d1tb00482d1.pdf]
